# Supplementary material for: Protection of COVID-19 vaccination and previous infection against Omicron BA.1, BA.2 and Delta SARS-CoV-2 infections
Source: bioRxiv or medRxiv preprint supplement (doi:10.1101/2022.02.06.22270457), 2022-05-12
Supplement: Supplementary file [file media-1.pdf]

## Supplementary material

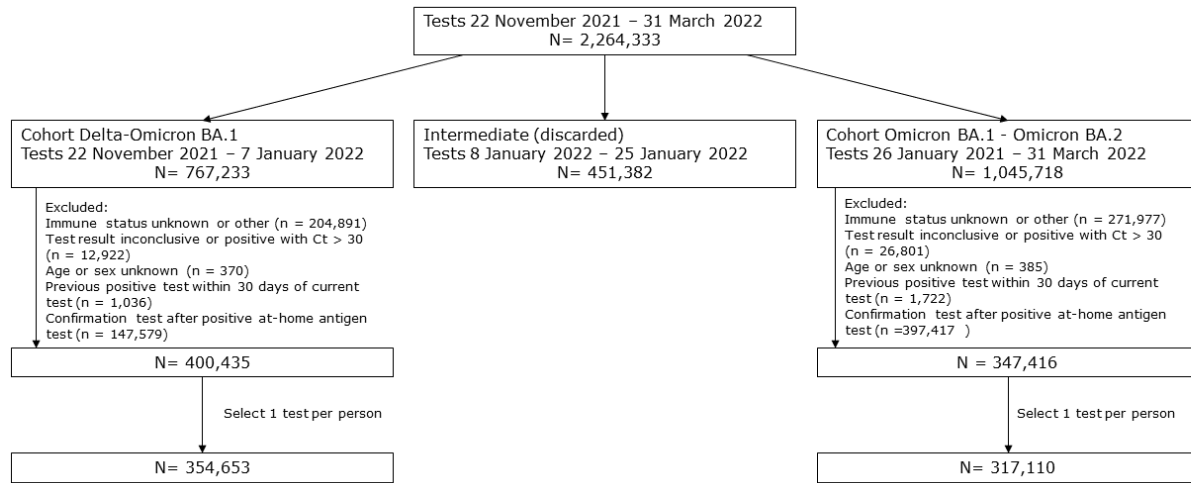

Figure S1. Flowchart of data selection

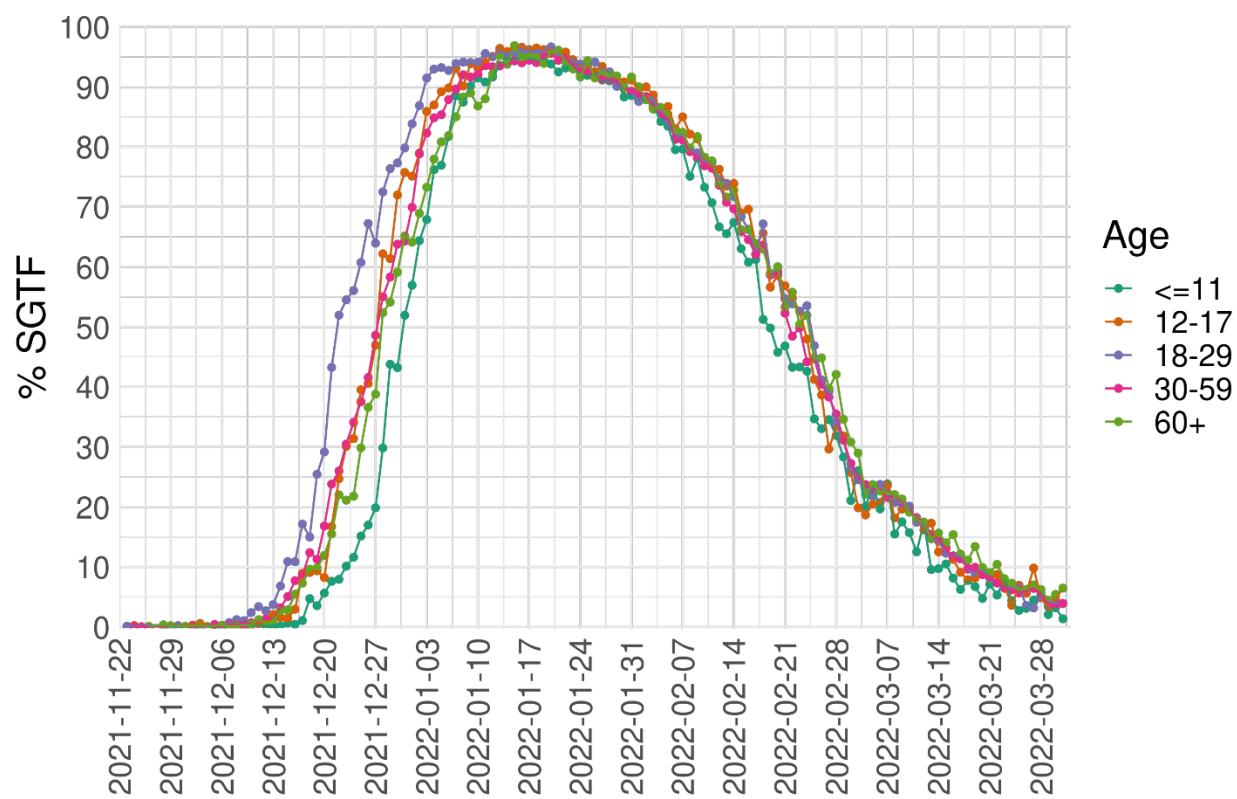

Figure S2. Proportion of SGTF among positive SARS-CoV-2 cases by age group, the Netherlands, 22 November 2021 - 31 March 2022, n = 941,692.

Table S1 WGS variant found in SGTF (S result, not detected) and non-SGTF (S result, detected) cases in each cohort. First column indicates the cohort, followed by the SGTF result. The number of WGS typed Omicron BA.1, Delta and BA.2 cases. Row-wise calculations on positive predictive value (PPV) and column-wise calculations on sensitivity.

| <b>Cohort</b>             | <b>S result</b> | <b>WGS result<br/>Omicron BA.1</b> | <b>WGS result<br/>Delta</b> | <b>WGS result<br/>Omicron BA.2</b> | <b>PPV</b> | <b>Sensitivity</b> |
|---------------------------|-----------------|------------------------------------|-----------------------------|------------------------------------|------------|--------------------|
| Cohort Delta-Omicron BA.1 | Not detected    | 132                                | 0                           | 0                                  | 1.00       | 1.00               |
| Cohort Delta-Omicron BA.1 | Detected        | 0                                  | 353                         | 0                                  | 1.00       | 1.00               |
|                           |                 |                                    |                             |                                    |            |                    |
| Cohort Omicron BA.1-BA.2  | Not detected    | 158                                | 0                           | 0                                  | 1.00       | 0.99               |
| Cohort Omicron BA.1-BA.2  | Detected        | 2                                  | 0                           | 128                                | 0.98       | 1.00               |

Table S2 Relative reduction in Delta and Omicron BA.1 infections after previous infection, primary vaccination, booster vaccination, or combinations of previous infection and vaccination (column 'Vaccination\_and\_previous\_infection\_status'), compared with naïve status  $((1-OR) * 100)$ , by time since last event and overall (column 'Time\_since\_event') in persons aged 18 and by variant (column 'variant'), for cohort Delta-Omicron BA.1 and cohort Omicron BA.1-BA.2 (column 'Cohort'). Estimates and 95%-CI (in brackets) are calculated for all cases (column 'VE\_CI') and cases with reported symptoms (column 'VE\_CI\_symptomatic\_infection').

Table S3 Protection estimates for booster vaccination and booster vaccination with a previous infection with 'Primary vaccinated' as reference.

| <b>Cohort</b>      | <b>Immuunstatus</b>         | <b>Variant</b> | <b>VE_CI</b> |
|--------------------|-----------------------------|----------------|--------------|
| Delta-Omicron BA.1 | Booster                     | Omicron BA.1   | 42% (38-46)  |
| Delta-Omicron BA.1 | Booster                     | Delta          | 73% (70-77)  |
| Delta-Omicron BA.1 | Previous infection, booster | Omicron BA.1   | 53% (45-61)  |
| Delta-Omicron BA.1 | Previous infection, booster | Delta          | 92% (83-96)  |
| Omicron BA.1-BA.2  | Booster                     | Omicron BA.1   | 47% (45-48)  |
| Omicron BA.1-BA.2  | Booster                     | Omicron BA.2   | 40% (38-42)  |
| Omicron BA.1-BA.2  | Previous infection, booster | Omicron BA.1   | 68% (66-70)  |
| Omicron BA.1-BA.2  | Previous infection, booster | Omicron BA.2   | 67% (65-69)  |

Table S4 Relative reduction in Delta and Omicron BA.1 infections after previous infection, primary vaccination, booster vaccination, or combinations of previous infection and vaccination (column Vaccination\_and\_previous\_infection\_status), compared with naïve status  $((1-OR) * 100)$ , by time since last event and overall (column Time\_since\_event), by age group (column Age\_group) and by variant (column 'variant'), for cohort Delta-Omicron BA.1 and cohort Omicron BA.1-BA.2 (column Cohort).

Table S5 Interaction terms between age and vaccination and previous infection status per cohort and variant with age group 18-29 years old as reference group.
